# Supplementary material
Source: publisher figshare collection journal article supplement (https://acs.figshare.com/ndownloader/files/25374119)
Supplement: Supplementary file 1 [file 25374119]

## Sheet: Sheet1
GO Biological Processes Enrichment of consensus cell envelope proteome of M. tuberculosis
Plasma membrane fraction											Cell wall fraction
Overrepresentation biological processes enrichment test (PANTHER, http://www.pantherdb.org/).
Analysis Type:	PANTHER Overrepresentation Test (Released 20200728)										Analysis Type:	PANTHER Overrepresentation Test (Released 20200728)
Annotation Version and Release Date:	GO Ontology database DOI: 10.5281/zenodo.3954044 Released 2020-07-16										Annotation Version and Release Date:	GO Ontology database DOI: 10.5281/zenodo.3954044 Released 2020-07-16
Analyzed List:	Client Text Box Input (Mycobacterium tuberculosis)										Analyzed List:	Client Text Box Input (Mycobacterium tuberculosis)
Reference List:	Mycobacterium tuberculosis (all genes in database)										Reference List:	Mycobacterium tuberculosis (all genes in database)
Test Type:	Fisher's Exact test										Test Type:	Fisher's Exact test
Correction:	FDR multiple test correction										Correction:	FDR multiple test correction
Reference list	Client Text Box Input										Reference list	Client Text Box Input
Uniquely Mapped IDs:	3969 out of 3969	66 out of 66									Uniquely Mapped IDs:	3969 out of 3969	66 out of 66
Unmapped IDs:	0	5									Unmapped IDs:	0	6
Multiple mapping information:	0	0									Multiple mapping information:	0	0
	Mycobacterium tuberculosis (REF)	Text Box Input										Mycobacterium tuberculosis (REF)	Text Box Input
GO biological processes complete	#	#	Expected	+/-	Fold Enrichment	P value	FDR				GO biological processes complete	#	#	Expected	+/-	Fold Enrichment	P value	FDR
cellular process (GO:0009987)	1673	50	27.82	+	1.8	4.93e-08	0.000117				protein folding (GO:0006457)	14	6	0.23	+	25.77	4.93e-07	0.00117
cellular metabolic process (GO:0044237)	1359	42	22.6	+	1.86	1.53e-06	0.00182				cellular process (GO:0009987)	1673	48	27.82	+	1.73	9.03e-07	0.00107
metabolic process (GO:0008152)	1775	49	29.52	+	1.66	2.13e-06	0.00168				response to heat (GO:0009408)	16	6	0.27	+	22.55	9.24e-07	0.000732
biological_process (GO:0008150)	2410	57	40.08	+	1.42	9.37e-06	0.00445				response to temperature stimulus (GO:0009266)	18	6	0.3	+	20.05	1.63e-06	0.000965
organonitrogen compound metabolic process (GO:1901564)	672	25	11.17	+	2.24	5.09e-05	0.0201				biological_process (GO:0008150)	2410	58	40.08	+	1.45	2.41e-06	0.000955
translation (GO:0006412)	101	9	1.68	+	5.36	6.04e-05	0.0205				positive regulation of transcription regulatory region DNA binding (GO:2000679)	4	4	0.07	+	60.14	4.35e-06	0.00148
response to stimulus (GO:0050896)	511	21	8.5	+	2.47	6.23e-05	0.0185				regulation of transcription regulatory region DNA binding (GO:2000677)	4	4	0.07	+	60.14	4.35e-06	0.00129
gene expression (GO:0010467)	201	12	3.34	+	3.59	0.000134	0.0355				response to abiotic stimulus (GO:0009628)	97	10	1.61	+	6.2	6.87e-06	0.00181
cellular amide metabolic process (GO:0043603)	172	11	2.86	+	3.85	0.000149	0.0355				chaperone cofactor-dependent protein refolding (GO:0051085)	5	4	0.08	+	48.11	7.74e-06	0.00184
peptide biosynthetic process (GO:0043043)	115	9	1.91	+	4.71	0.000154	0.0333				'de novo' posttranslational protein folding (GO:0051084)	5	4	0.08	+	48.11	7.74e-06	0.00167
primary metabolic process (GO:0044238)	1259	36	20.94	+	1.72	0.000158	0.0312				fatty acid biosynthetic process (GO:0006633)	80	9	1.33	+	6.77	1.09e-05	0.00215
cellular protein metabolic process (GO:0044267)	206	12	3.43	+	3.5	0.000168	0.0306				'de novo' protein folding (GO:0006458)	6	4	0.1	+	40.09	1.27e-05	0.00233
cellular macromolecule biosynthetic process (GO:0034645)	246	13	4.09	+	3.18	0.00022	0.0373				chaperone-mediated protein folding (GO:0061077)	6	4	0.1	+	40.09	1.27e-05	0.00216
peptide metabolic process (GO:0006518)	122	9	2.03	+	4.44	0.000235	0.0371				positive regulation of binding (GO:0051099)	7	4	0.12	+	34.36	1.98e-05	0.00313
response to abiotic stimulus (GO:0009628)	97	8	1.61	+	4.96	0.000264	0.0392				positive regulation of DNA binding (GO:0043388)	7	4	0.12	+	34.36	1.98e-05	0.00294
macromolecule biosynthetic process (GO:0009059)	251	13	4.17	+	3.11	0.000266	0.0371				response to stress (GO:0006950)	230	14	3.82	+	3.66	2.74e-05	0.00383
cellular nitrogen compound biosynthetic process (GO:0044271)	363	16	6.04	+	2.65	0.000281	0.0371				regulation of DNA binding (GO:0051101)	8	4	0.13	+	30.07	2.93e-05	0.00387
oxidation-reduction process (GO:0055114)	514	20	8.55	+	2.34	0.000287	0.0359				monocarboxylic acid biosynthetic process (GO:0072330)	95	9	1.58	+	5.7	3.86e-05	0.00483
cellular biosynthetic process (GO:0044249)	746	25	12.41	+	2.02	0.000365	0.0433				regulation of binding (GO:0051098)	9	4	0.15	+	26.73	4.18e-05	0.00496
											fatty acid metabolic process (GO:0006631)	126	10	2.1	+	4.77	5.72e-05	0.00647
											metabolic process (GO:0008152)	1775	46	29.52	+	1.56	8.2e-05	0.00885
											cellular response to external stimulus (GO:0071496)	47	6	0.78	+	7.68	0.000191	0.0197
											cellular response to extracellular stimulus (GO:0031668)	47	6	0.78	+	7.68	0.000191	0.0189
											regulation of molecular function (GO:0065009)	29	5	0.48	+	10.37	0.000194	0.0184
											positive regulation of molecular function (GO:0044093)	15	4	0.25	+	16.04	0.00021	0.0192
											protein refolding (GO:0042026)	5	3	0.08	+	36.08	0.000221	0.0194
											response to extracellular stimulus (GO:0009991)	49	6	0.81	+	7.36	0.000235	0.02
											biosynthetic process (GO:0009058)	788	26	13.1	+	1.98	0.000284	0.0232
											cellular component organization or biogenesis (GO:0071840)	219	12	3.64	+	3.3	0.000289	0.0229
											cellular response to nutrient levels (GO:0031669)	33	5	0.55	+	9.11	0.000332	0.0255
											cellular response to starvation (GO:0009267)	33	5	0.55	+	9.11	0.000332	0.0247
											monocarboxylic acid metabolic process (GO:0032787)	190	11	3.16	+	3.48	0.000342	0.0246
											cellular metabolic process (GO:0044237)	1359	37	22.6	+	1.64	0.00036	0.0252
											cellular biosynthetic process (GO:0044249)	746	25	12.41	+	2.02	0.000365	0.0248
											response to starvation (GO:0042594)	34	5	0.57	+	8.84	0.000376	0.0248
											response to nutrient levels (GO:0031667)	35	5	0.58	+	8.59	0.000425	0.0273
											cellular component organization (GO:0016043)	166	10	2.76	+	3.62	0.000486	0.0304
											organic substance biosynthetic process (GO:1901576)	771	25	12.82	+	1.95	0.000504	0.0307
											response to hypoxia (GO:0001666)	58	6	0.96	+	6.22	0.000542	0.0322
											ATP synthesis coupled proton transport (GO:0015986)	8	3	0.13	+	22.55	0.000628	0.0364
											energy coupled proton transport, down electrochemical gradient (GO:0015985)	8	3	0.13	+	22.55	0.000628	0.0355
											oxidation-reduction process (GO:0055114)	514	19	8.55	+	2.22	0.000681	0.0376
											response to decreased oxygen levels (GO:0036293)	61	6	1.01	+	5.92	0.000695	0.0375
											response to oxygen levels (GO:0070482)	63	6	1.05	+	5.73	0.000813	0.0429
											ATP biosynthetic process (GO:0006754)	9	3	0.15	+	20.05	0.000828	0.0427
